# Supplementary material for: Clinical diagnosis of diabetes using machine learning and surface-enhanced Raman spectroscopy liquid biopsy: an exploratory study
Source: Royal Society of Chemistry journal article supplement (doi:10.1039/d5na00905g), 2025-01-01
Supplement: d5na00905g1.pdf [file d5na00905g1.pdf]

- SUPPORTING INFORMATION -

**Clinical Diagnosis of Diabetes Using Machine Learning and Surface-enhanced Raman Spectroscopy Liquid Biopsy: An Exploratory Study**

Allah Ditta,<sup>1</sup> Peiying Wu,<sup>1</sup> Rui Zhang,<sup>1</sup> Haq Nawaz,<sup>2</sup> Muhammad Irfan Majeed,<sup>2</sup> Sima Rezvantalab,<sup>3</sup>

Sara Mihandoost,<sup>4</sup> Eva Miriam Buhl,<sup>5</sup> Stephan Rütten,<sup>5</sup> Fabian Kiessling,<sup>1</sup> Twan Lammers,<sup>1</sup>

and Roger M. Pallares<sup>1,\*</sup>

<sup>1</sup> Institute for Experimental Molecular Imaging, RWTH Aachen University Hospital, Aachen 52074, Germany

<sup>2</sup> Department of Chemistry, University of Agriculture Faisalabad, Faisalabad (38000), Pakistan

<sup>3</sup> Chemical Engineering Department, Urmia University of Technology, Urmia 57166-419, Iran

<sup>4</sup> Electrical Engineering Department, Urmia University of Technology, Urmia 57166-419, Iran

<sup>5</sup> Electron Microscope Facility, Institute for Pathology, RWTH Aachen University Hospital, Aachen 52074, Germany

\*Corresponding author: [rmoltopallar@ukaachen.de](mailto:rmoltopallar@ukaachen.de)

**Table of Contents**

|                                                                                           |   |
|-------------------------------------------------------------------------------------------|---|
| Figure S1. Representative SERS spectra before (raw) and after pre-processing.....         | 2 |
| Table S1. List of samples with gender, age, medication, and other disease.....            | 3 |
| Figure S2. PCA analysis of original and synthetic data points from the healthy group..... | 5 |
| Table S2. 95% confidence intervals of model performance without and with SMOTE.....       | 6 |
| Figure S3. AUC mean difference plots without SMOTE-generated data for all models.....     | 7 |
| Figure S4. AUC mean difference plots with SMOTE-generated data for all models.....        | 8 |

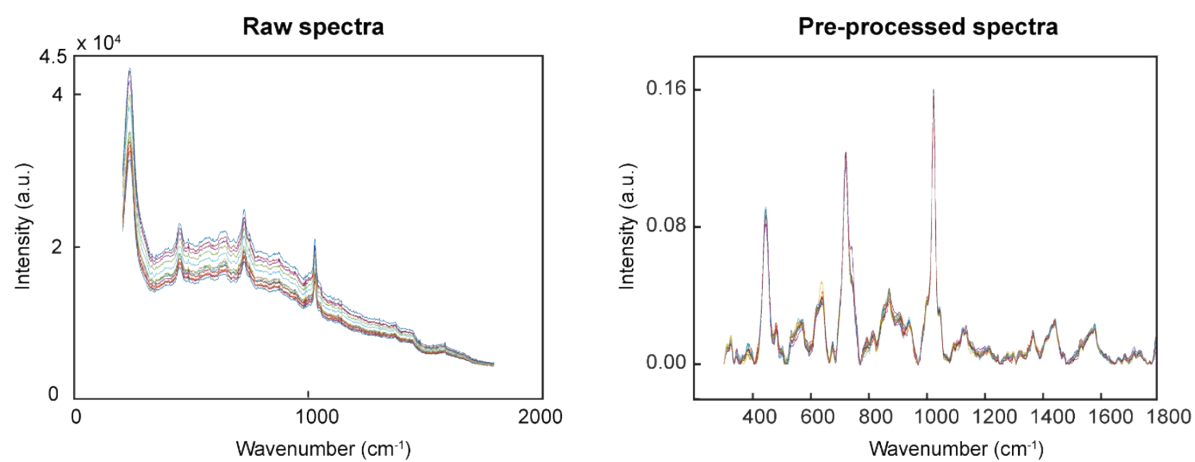

**Figure S1. Representative SERS spectra before (raw) and after pre-processing.** Pre-processing steps include normalization, baseline correction, and smoothing.

**Table S1. List of samples with gender, age, medication, and other disease.**

| Serial Number | Gender | Age | Diabetes | Medication | Other Disease |
|---------------|--------|-----|----------|------------|---------------|
| 1             | Female | 41  | Yes      | No         | No            |
| 2             | Female | 45  | Yes      | No         | No            |
| 3             | Female | 45  | Yes      | No         | No            |
| 4             | Male   | 44  | Yes      | No         | No            |
| 5             | Male   | 40  | Yes      | No         | No            |
| 6             | Male   | 40  | Yes      | No         | No            |
| 7             | Male   | 40  | Yes      | No         | No            |
| 8             | Female | 43  | Yes      | No         | No            |
| 9             | Male   | 40  | Yes      | No         | No            |
| 10            | Male   | 40  | Yes      | No         | No            |
| 11            | Male   | 43  | Yes      | No         | No            |
| 12            | Female | 42  | Yes      | No         | No            |
| 13            | Female | 40  | Yes      | No         | No            |
| 14            | Male   | 41  | Yes      | No         | No            |
| 15            | Male   | 40  | Yes      | No         | No            |
| 16            | Male   | 44  | Yes      | No         | No            |
| 17            | Male   | 41  | Yes      | No         | No            |
| 18            | Female | 45  | Yes      | No         | No            |
| 19            | Female | 40  | Yes      | No         | No            |
| 20            | Female | 41  | Yes      | No         | No            |
| 21            | Male   | 45  | Yes      | No         | No            |
| 22            | Female | 42  | Yes      | No         | No            |
| 23            | Female | 42  | Yes      | No         | No            |
| 24            | Female | 43  | Yes      | No         | No            |
| 25            | Female | 41  | Yes      | No         | No            |
| 26            | Female | 44  | Yes      | No         | No            |
| 27            | Male   | 43  | Yes      | No         | No            |
| 28            | Male   | 45  | Yes      | No         | No            |
| 29            | Female | 44  | Yes      | No         | No            |
| 30            | Female | 45  | Yes      | No         | No            |
| 31            | Male   | 40  | Yes      | No         | No            |
| 32            | Male   | 40  | Yes      | No         | No            |
| 33            | Female | 41  | Yes      | No         | No            |
| 34            | Male   | 44  | Yes      | No         | No            |
| 35            | Male   | 45  | Yes      | No         | No            |
| 36            | Female | 42  | Yes      | No         | No            |
| 37            | Female | 45  | Yes      | No         | No            |
| 38            | Female | 43  | Yes      | No         | No            |
| 39            | Male   | 40  | Yes      | No         | No            |
| 40            | Male   | 44  | Yes      | No         | No            |
| 41            | Male   | 45  | Yes      | No         | No            |
| 42            | Male   | 41  | Yes      | No         | No            |
| 43            | Male   | 42  | No       | No         | No            |
| 44            | Male   | 42  | No       | No         | No            |
| 45            | Female | 40  | No       | No         | No            |
| 46            | Male   | 43  | No       | No         | No            |
| 47            | Male   | 42  | No       | No         | No            |
| 48            | Female | 45  | No       | No         | No            |
| 49            | Female | 42  | No       | No         | No            |

|    |        |    |    |    |    |
|----|--------|----|----|----|----|
| 50 | Female | 40 | No | No | No |
| 51 | Female | 40 | No | No | No |
| 52 | Female | 43 | No | No | No |

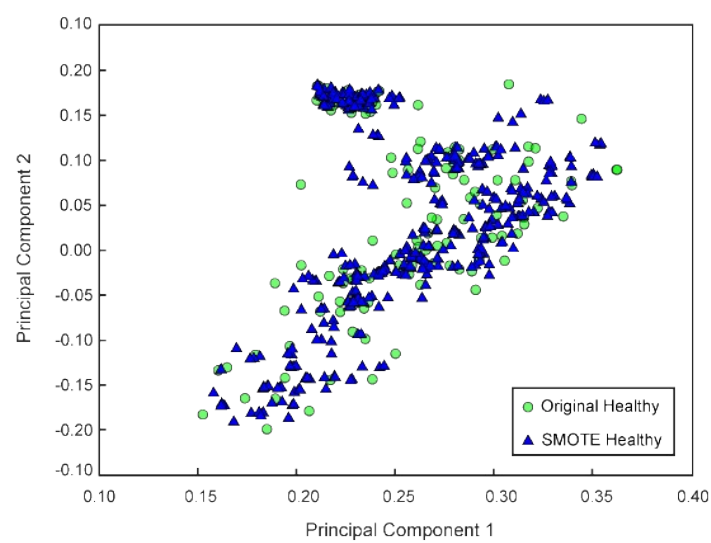

**Figure S2. PCA analysis of original and synthetic data points from the healthy group.**

| <b>Table S2. 95% confidence intervals (CI) of model performance without and with SMOTE.</b> |                      |                   |
|---------------------------------------------------------------------------------------------|----------------------|-------------------|
| Model                                                                                       | 95% CI without SMOTE | 95% CI with SMOTE |
| KNN                                                                                         | 0.89-0.94            | 0.94-0.97         |
| ANN                                                                                         | 0.78-0.85            | 0.92-0.96         |
| QDA                                                                                         | 0.81-0.90            | 0.90-0.96         |
| SVM                                                                                         | 0.50-0.59            | 0.89-0.95         |

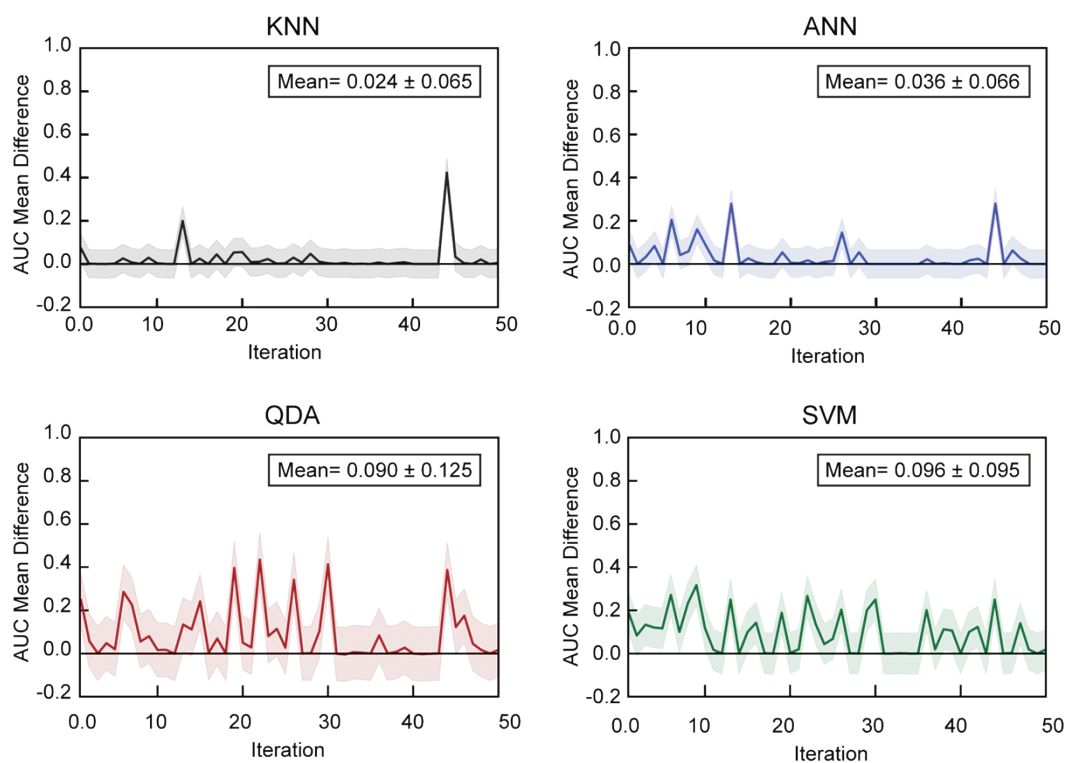

**Figure S3. AUC mean difference plots of training and testing datasets without SMOTE-generated data for all models.**

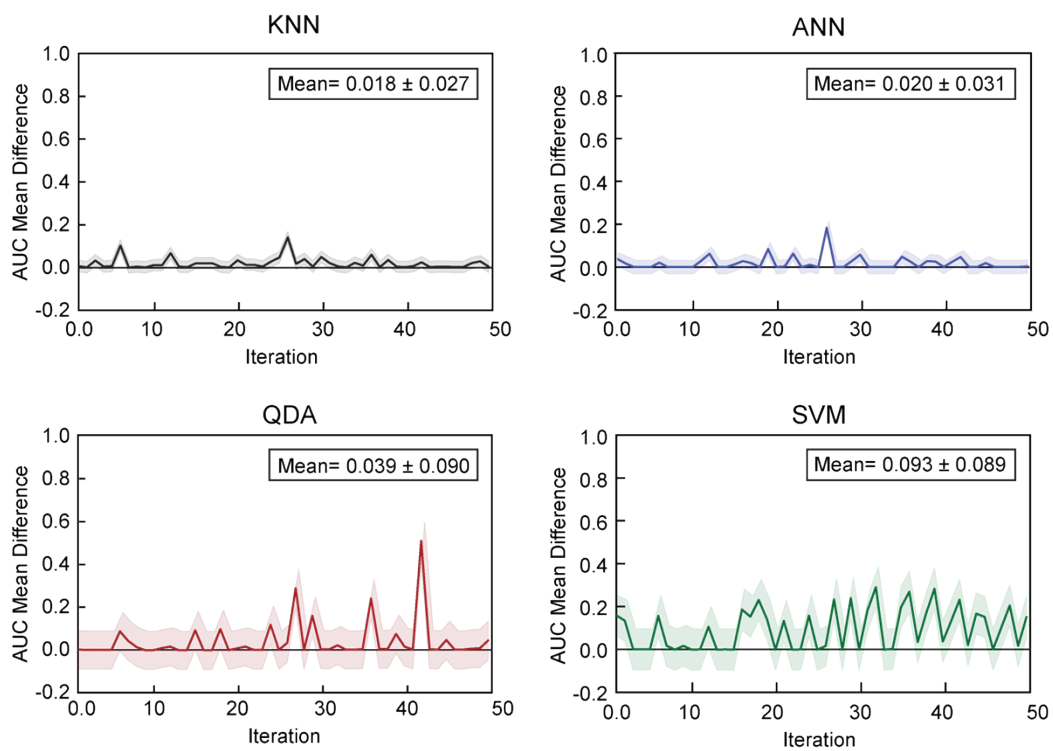

**Figure S4. AUC mean difference plots of training and testing datasets with SMOTE-generated data for all models.**
